# Supplementary material for: Prenatal Risk Factors and Perinatal and Postnatal Outcomes Associated With Maternal Opioid Exposure in an Urban, Low-Income, Multiethnic US Population
Source: PubMed Central journal article supplement (PMC6604084; doi:10.1001/jamanetworkopen.2019.6405), 2019-06-28
Supplement: jamanetwopen-2-e196405-s001.pdf [file jamanetwopen-2-e196405-s001.pdf]

## Supplementary Online Content

Azuine RE, Ji Y, Chang H-Y, et al. Prenatal risk factors and perinatal and postnatal outcomes associated with maternal opioid exposure in an urban, low-income, multiethnic US population. *JAMA Netw Open*. 2019;2(6):e196405. doi:10.1001/jamanetworkopen.2019.6405

**eFigure.** Trend of the Incidence Rate for Physician Diagnosed Neonatal Abstinence Syndrome (NAS) in the Boston Birth Cohort, Based on Electronic Medical Record Data From 2003 to 2016

**eTable 1.** Baseline Characteristics of Mother-Newborn Pairs With Postnatal Follow-up vs Those Without in the Boston Birth Cohort, Using 1 of 10 Imputed Data Sets

**eTable 2.** Pregnancy Complications and Birth Outcomes Associated With Maternal Opioid Exposure in the Boston Birth Cohort, With Complete Data Results, Using Log-Linear Model

**eTable 3.** Postnatal Physical Health and Neurodevelopmental Outcomes Associated With Maternal Opioid Exposure in the Boston Birth Cohort, With Complete Data Results, Using Log-Linear Model

**eTable 4.** ADHD Associated With Maternal Opioid Exposure in the Boston Birth Cohort, Using Cox Regression Model

**eTable 5.** Pregnancy Complications and Birth Outcomes Associated With Maternal Opioid Exposure After Excluding Infants Born Before 2003

**eTable 6.** Postnatal Physical Health and Neurodevelopmental Outcomes Associated With Maternal Opioid Exposure After Excluding Infants Born Before 2003

**eTable 7.** Pregnancy Complications and Birth Outcomes Associated With Maternal Opioid Exposure, Further Adjusting Birth Year Period (1998-2007 vs 2008-2014+)

This supplementary material has been provided by the authors to give readers additional information about their work.

eFigure. Trend of the Incidence Rate for Physician Diagnosed Neonatal Abstinence Syndrome (NAS) in the Boston Birth Cohort, Based on Electronic Medical Record Data From 2003 to 2016

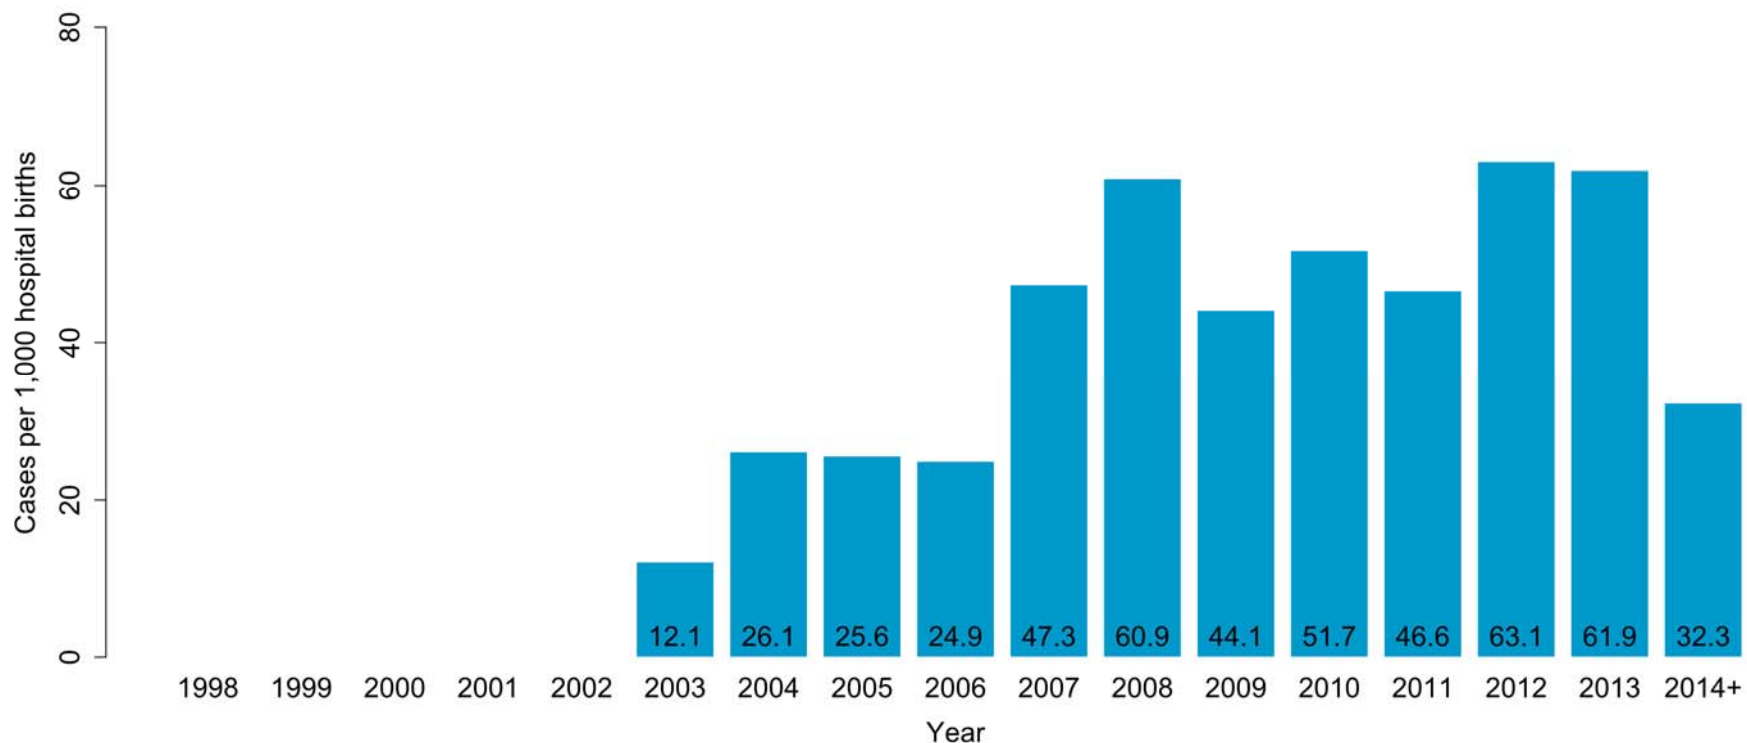

| Year        | 1998 | 1999 | 2000 | 2001 | 2002 | 2003 | 2004 | 2005 | 2006 | 2007 | 2008 | 2009 | 2010 | 2011 | 2012 | 2013 | 2014+ |
|-------------|------|------|------|------|------|------|------|------|------|------|------|------|------|------|------|------|-------|
| Total birth | 36   | 543  | 455  | 598  | 445  | 497  | 498  | 391  | 522  | 676  | 706  | 703  | 716  | 687  | 666  | 339  | 31    |
| NAS         | NA   | NA   | NA   | NA   | NA   | 6    | 13   | 10   | 13   | 32   | 43   | 31   | 37   | 32   | 42   | 21   | 1     |

Note: EMR data was not available before 2003.

eTable 1. Baseline Characteristics of Mother-Newborn Pairs With Postnatal Follow-up vs. Those Without in the Boston Birth Cohort, Using 1 of 10 Imputed Data Sets

| Baseline characteristics               | With Postnatal f/u | No Postnatal f/u | P-value |
|----------------------------------------|--------------------|------------------|---------|
| N                                      | 3153               | 5356             |         |
| Maternal age (%)                       |                    |                  |         |
| <=20                                   | 295 (9.4)          | 614 (11.5)       | 0.003   |
| 21-30                                  | 1584 (50.2)        | 2719 (50.8)      |         |
| >30                                    | 1274 (40.4)        | 2023 (37.8)      |         |
| Maternal pre-pregnancy BMI (mean (SD)) | 27 (6.6)           | 26 (6.0)         | <0.001  |
| Parity (%)                             |                    |                  |         |
| Nulliparous                            | 1344 (42.6)        | 2318 (43.3)      | 0.572   |
| Multiparous                            | 1809 (57.4)        | 3038 (56.7)      |         |
| Household income (%)                   |                    |                  |         |
| <\$30,000                              | 1353 (42.9)        | 2134 (39.8)      | 0.020   |
| >=\$30,000                             | 388 (12.3)         | 706 (13.2)       |         |
| Unknown                                | 1412 (44.8)        | 2516 (47)        |         |
| Ethnicity (%)                          |                    |                  |         |
| Black                                  | 2011 (63.8)        | 2382 (44.5)      | <0.001  |
| White                                  | 228 (7.2)          | 778 (14.5)       |         |
| Hispanic                               | 702 (22.3)         | 1721 (32.1)      |         |
| Others                                 | 212 (6.7)          | 475 (8.9)        |         |
| Marital status (%)                     |                    |                  |         |
| Married                                | 1041 (33)          | 1892 (35.3)      | 0.032   |
| Not Married                            | 2112 (67)          | 3464 (64.7)      |         |
| Maternal education (%)                 |                    |                  |         |
| Below college                          | 2026 (64.3)        | 3499 (65.3)      | 0.328   |
| Above college                          | 1127 (35.7)        | 1857 (34.7)      |         |
| Maternal smoking (%)                   |                    |                  |         |
| No                                     | 2572 (81.6)        | 4291 (80.1)      | 0.106   |
| Yes                                    | 581 (18.4)         | 1065 (19.9)      |         |
| Maternal drinking (%)                  |                    |                  |         |
| No                                     | 2896 (91.8)        | 4853 (90.6)      | 0.058   |
| Yes                                    | 257 (8.2)          | 503 (9.4)        |         |
| Child's gender (%)                     |                    |                  |         |
| Female                                 | 1564 (49.6)        | 2708 (50.6)      | 0.407   |
| Male                                   | 1589 (50.4)        | 2648 (49.4)      |         |
| <b>Maternal marijuana use (%)</b>      |                    |                  |         |
| No                                     | 2538 (80.5)        | 4321 (80.7)      | 0.860   |
| Yes                                    | 615 (19.5)         | 1035 (19.3)      |         |
| <b>Maternal stimulants use (%)</b>     |                    |                  |         |
| No                                     | 3007 (95.4)        | 4978 (92.9)      | <0.001  |
| Yes                                    | 146 (4.6)          | 378 (7.1)        |         |
| <b>Cocaine (%)</b>                     |                    |                  |         |
| No                                     | 3024 (95.9)        | 5028 (93.9)      | <0.001  |
| Yes                                    | 129 (4.1)          | 328 (6.1)        |         |
| <b>Crack (%)</b>                       |                    |                  |         |
| No                                     | 3078 (97.6)        | 5196 (97)        | 0.113   |
| Yes                                    | 75 (2.4)           | 160 (3)          |         |
| <b>Amphetamine (%)</b>                 |                    |                  |         |
| No                                     | 3121 (99)          | 5299 (98.9)      | 0.916   |
| Yes                                    | 32 (1)             | 57 (1.1)         |         |
| <b>Ecstasy (%)</b>                     |                    |                  |         |
| No                                     | 3095 (98.2)        | 5225 (97.6)      | 0.079   |

|                                 |     |             |             |       |
|---------------------------------|-----|-------------|-------------|-------|
|                                 | Yes | 58 (1.8)    | 131 (2.4)   |       |
| Phencyclidine (PCP) (%)         |     |             |             |       |
|                                 | No  | 3144 (99.7) | 5333 (99.6) | 0.387 |
|                                 | Yes | 9 (0.3)     | 23 (0.4)    |       |
| <b>Maternal Opioids use (%)</b> |     |             |             |       |
|                                 | No  | 3035 (96.3) | 5066 (94.6) | 0.001 |
|                                 | Yes | 118 (3.7)   | 290 (5.4)   |       |
| Heroin (%)                      |     |             |             |       |
|                                 | No  | 3054 (96.9) | 5107 (95.4) | 0.001 |
|                                 | Yes | 99 (3.1)    | 249 (4.6)   |       |
| Methadone (%)                   |     |             |             |       |
|                                 | No  | 3082 (97.7) | 5183 (96.8) | 0.011 |
|                                 | Yes | 71 (2.3)    | 173 (3.2)   |       |
| Oxycodone (%)                   |     |             |             |       |
|                                 | No  | 3080 (97.7) | 5225 (97.6) | 0.759 |
|                                 | Yes | 73 (2.3)    | 131 (2.4)   |       |
| NAS baby (%)                    |     |             |             |       |
|                                 | No  | 3063 (97.1) | 5165 (96.4) | 0.087 |
|                                 | Yes | 90 (2.9)    | 191 (3.6)   |       |

Note: The p-values were obtained by chi-squared (or fisher exact for small cells) tests and t-tests for categorical and continuous variables, respectively. The frequency, percentage, and p-value are pooled estimations from ten imputed dataset.

eTable 2. Pregnancy Complications and Birth Outcomes Associated With Maternal Opioid Exposure in the Boston Birth Cohort, With Complete Data Results, Using Log-Linear Model

| Outcomes                        | Complete-case analysis (N=7281) § |           |                       |           | Multiple imputation (N=8509) ‡ |           |                       |           |             |
|---------------------------------|-----------------------------------|-----------|-----------------------|-----------|--------------------------------|-----------|-----------------------|-----------|-------------|
|                                 | Crude Log-linear                  |           | Adjusted Log-linear † |           | Crude Log-linear               |           | Adjusted Log-linear † |           |             |
|                                 | RR                                | 95% CI    | RR                    | 95% CI    | RR                             | 95% CI    | RR                    | 95% CI    |             |
| N                               |                                   |           |                       |           |                                |           |                       |           |             |
| <b>Pregnancy complications</b>  |                                   |           |                       |           |                                |           |                       |           |             |
| Hypertensive disorder (%)       |                                   |           |                       |           |                                |           |                       |           |             |
|                                 | No                                | Reference |                       | Reference |                                | Reference |                       | Reference |             |
|                                 | Yes                               | 0.74      | [0.54,1.00]           | 0.95      | [0.67,1.32]                    | 0.74      | [0.55,1.01]           | 0.93      | [0.67,1.30] |
| Maternal diabetes (%)           |                                   |           |                       |           |                                |           |                       |           |             |
|                                 | No                                | Reference |                       | Reference |                                | Reference |                       | Reference |             |
|                                 | Yes                               | 1.36      | [1.03,1.75]           | 1.53      | [1.12,2.06]                    | 1.36      | [1.05,1.76]           | 1.54      | [1.15,2.06] |
| Prepregnancy weight status (%)* |                                   |           |                       |           |                                |           |                       |           |             |
|                                 | Underweight                       | 1.22      | [0.83,1.74]           | 1.13      | [0.71,1.76]                    | 1.32      | [0.93,1.86]           | 1.16      | [0.76,1.76] |
|                                 | Normal weight                     | Reference |                       | Reference |                                | Reference |                       | Reference |             |
|                                 | Overweight/obese                  | 0.68      | [0.57,0.80]           | 0.73      | [0.60,0.88]                    | 0.69      | [0.58,0.81]           | 0.75      | [0.62,0.90] |
| <b>Birth outcomes</b>           |                                   |           |                       |           |                                |           |                       |           |             |
| Preterm birth (%)               |                                   |           |                       |           |                                |           |                       |           |             |
|                                 | No                                | Reference |                       | Reference |                                | Reference |                       | Reference |             |
|                                 | Yes                               | 1.32      | [1.11,1.55]           | 1.26      | [1.03,1.52]                    | 1.38      | [1.18,1.61]           | 1.30      | [1.09,1.57] |
| Fetal growth (%)¶               |                                   |           |                       |           |                                |           |                       |           |             |
|                                 | AGA                               | Reference |                       | Reference |                                | Reference |                       | Reference |             |
|                                 | LGA                               | 0.50      | [0.30,0.78]           | 0.45      | [0.26,0.72]                    | 0.50      | [0.31,0.78]           | 0.44      | [0.27,0.72] |
|                                 | SGA                               | 1.72      | [1.39,2.12]           | 1.72      | [1.32,2.22]                    | 1.65      | [1.34,2.04]           | 1.66      | [1.29,2.13] |

\*According to the Institute of Medicine's BMI classification.

§Complete-case means only use the data without any missing.

¶ AGA: appropriate for gestational age; LGA: large for gestational age; SGA: small for gestational age

†Multiple Log-linear Regression adjusted for: maternal age, household income, race, marital status, maternal education

‡pooled estimates of ten imputed datasets

eTable 3. Postnatal Physical Health and Neurodevelopmental Outcomes Associated with Maternal Opioid Exposure in the Boston Birth Cohort, With Complete Data Results, Using Log-Linear Model

| Outcomes                                          |     | Complete-case analysis (N=7281)* |             |                          |             | Multiple imputation (N=8509)‡ |             |                          |             |
|---------------------------------------------------|-----|----------------------------------|-------------|--------------------------|-------------|-------------------------------|-------------|--------------------------|-------------|
|                                                   |     | Crude Log-linear                 |             | Adjusted Log-linear<br>† |             | Crude Log-linear              |             | Adjusted Log-linear<br>† |             |
|                                                   |     | RR                               | 95% CI      | RR                       | 95% CI      | RR                            | 95% CI      | RR                       | 95% CI      |
| <b>All age groups</b>                             |     | N=2798                           |             |                          |             | N=3153                        |             |                          |             |
| ADHD                                              |     |                                  |             |                          |             |                               |             |                          |             |
|                                                   | No  | Reference                        |             | Reference                |             | Reference                     |             | Reference                |             |
|                                                   | Yes | 1.28                             | [0.83,1.87] | 1.30                     | [0.79,2.05] | 1.23                          | [0.82,1.84] | 1.24                     | [0.78,1.98] |
| Conduct disorder or Emotional disturbance         |     |                                  |             |                          |             |                               |             |                          |             |
|                                                   | No  | Reference                        |             | Reference                |             | Reference                     |             | Reference                |             |
|                                                   | Yes | 1.35                             | [0.91,1.91] | 1.44                     | [0.92,2.00] | 1.28                          | [0.89,1.85] | 1.37                     | [0.89,2.10] |
| Lack of expected normal physiological development |     |                                  |             |                          |             |                               |             |                          |             |
|                                                   | No  | Reference                        |             | Reference                |             | Reference                     |             | Reference                |             |
|                                                   | Yes | 1.52                             | [1.19,1.91] | 1.39                     | [1.04,1.82] | 1.52                          | [1.20,1.92] | 1.38                     | [1.05,1.80] |
| <b>Medical record within first 5 years</b>        |     | N=2767                           |             |                          |             | N=3106                        |             |                          |             |
| ADHD                                              |     |                                  |             |                          |             |                               |             |                          |             |
|                                                   | No  | Reference                        |             | Reference                |             | Reference                     |             | Reference                |             |
|                                                   | Yes | 1.64                             | [0.80,2.96] | 1.09                     | [0.48,2.31] | 1.55                          | [0.82,2.95] | 1.00                     | [0.47,2.16] |
| Conduct disorder or Emotional disturbance         |     |                                  |             |                          |             |                               |             |                          |             |
|                                                   | No  | Reference                        |             | Reference                |             | Reference                     |             | Reference                |             |
|                                                   | Yes | 2.00                             | [1.26,3.03] | 1.99                     | [1.14,3.31] | 1.97                          | [1.28,3.05] | 1.93                     | [1.14,3.26] |
| Lack of expected normal physiological development |     |                                  |             |                          |             |                               |             |                          |             |
|                                                   | No  | Reference                        |             | Reference                |             | Reference                     |             | Reference                |             |
|                                                   | Yes | 1.45                             | [1.11,1.85] | 1.35                     | [0.99,1.80] | 1.45                          | [1.13,1.86] | 1.33                     | [1.00,1.78] |
| <b>Medical record at 6 and older</b>              |     | N=2107                           |             |                          |             | N=2391                        |             |                          |             |
| ADHD                                              |     |                                  |             |                          |             |                               |             |                          |             |
|                                                   | No  | Reference                        |             | Reference                |             | Reference                     |             | Reference                |             |
|                                                   | Yes | 2.21                             | [1.40,3.32] | 2.01                     | [1.21,3.17] | 2.17                          | [1.41,3.33] | 1.97                     | [1.23,3.15] |
| Conduct disorder or Emotional disturbance         |     |                                  |             |                          |             |                               |             |                          |             |
|                                                   | No  | Reference                        |             | Reference                |             | Reference                     |             | Reference                |             |
|                                                   | Yes | 1.82                             | [1.06,2.91] | 1.61                     | [0.89,2.72] | 1.73                          | [1.05,2.85] | 1.57                     | [0.91,2.70] |
| Lack of expected normal physiological development |     |                                  |             |                          |             |                               |             |                          |             |
|                                                   | No  | Reference                        |             | Reference                |             | Reference                     |             | Reference                |             |
|                                                   | Yes | 0.96                             | [0.41,1.87] | 0.67                     | [0.28,1.37] | 0.96                          | [0.45,2.03] | 0.67                     | [0.31,1.48] |

§Based on ICD-9 and ICD-10 diagnosis codes: ADHD (ICD-9: 314.0-314.9; ICD-10: F90.0-F90.9), conduct disorder or emotional disturbance (ICD-9: 312.0-312.9, 313.0-313.9; ICD-10: F91.0-F91.9, F93.0, F93.8, F93.9), and lack of expected normal physiological development (ICD-9: 783.40-783.43; ICD-10: R62.0, R62.50-R62.59).

\*Complete-case means only use the data without any missing.

†Multiple Log-linear Regression adjusted for: maternal age, household income, race, marital status, maternal education, preterm birth, low birthweight.

‡pooled estimates of ten imputed datasets

eTable 4. ADHD Associated With Maternal Opioid Exposure in the Boston Birth Cohort, Using Cox Regression Model

| Outcomes                  |     | Complete-case analysis (N=7281)* |              |                     |             | Multiple imputation (N=8509)‡ |             |                     |             |
|---------------------------|-----|----------------------------------|--------------|---------------------|-------------|-------------------------------|-------------|---------------------|-------------|
|                           |     | Crude Cox model                  |              | Adjusted Cox model† |             | Crude Cox model               |             | Adjusted Cox model† |             |
|                           |     | HR                               | 95% CI       | HR                  | 95% CI      | HR                            | 95% CI      | HR                  | 95% CI      |
| All age groups            |     |                                  | N=2798       |                     |             |                               | N=3153      |                     |             |
| ADHD                      | No  | Reference                        |              | Reference           |             | Reference                     |             | Reference           |             |
|                           | Yes | 2.50                             | [1.66,3.74]  | 2.11                | [1.33,3.35] | 2.46                          | [1.64,3.68] | 2.07                | [1.32,3.24] |
| Follow-up length < 6      |     |                                  | N=691        |                     |             |                               | N=762       |                     |             |
| ADHD                      | No  | Reference                        |              | Reference           |             | Reference                     |             | Reference           |             |
|                           | Yes | 2.45                             | [0.53,11.41] | 0.69                | [0.10,4.81] | 1.99                          | [0.44,8.91] | 0.81                | [0.13,5.19] |
| Follow-up length ≥6 years |     |                                  | N=2107       |                     |             |                               | N=2391      |                     |             |
| ADHD                      | No  | Reference                        |              | Reference           |             | Reference                     |             | Reference           |             |
|                           | Yes | 2.60                             | [1.71,3.96]  | 2.28                | [1.42,3.65] | 2.59                          | [1.7,3.94]  | 2.23                | [1.41,3.55] |

†Cox regression adjusted for: maternal age, household income, race, marital status, maternal education, preterm birth, low birthweight.

\*Complete-case means only use the data without any missing.

‡pooled estimates of ten imputed datasets



eTable 5. Pregnancy Complications and Birth Outcomes Associated With Maternal Opioid Exposure After Excluding Infants Born Before 2003

| Outcomes                              | Complete-case analysis (N=5700)§ |           |                    |           | Multiple imputation (N=6432)‡ |           |                    |           |             |
|---------------------------------------|----------------------------------|-----------|--------------------|-----------|-------------------------------|-----------|--------------------|-----------|-------------|
|                                       | Crude logistic                   |           | Adjusted logistic† |           | Crude logistic                |           | Adjusted logistic† |           |             |
|                                       | OR                               | 95% CI    | OR                 | 95% CI    | OR                            | 95% CI    | OR                 | 95% CI    |             |
| N                                     |                                  |           |                    |           |                               |           |                    |           |             |
| <b><u>Pregnancy complications</u></b> |                                  |           |                    |           |                               |           |                    |           |             |
| Hypertensive disorder (%)             |                                  |           |                    |           |                               |           |                    |           |             |
|                                       | No                               | Reference |                    | Reference |                               | Reference |                    | Reference |             |
|                                       | Yes                              | 0.73      | [0.51,1.01]        | 0.99      | [0.66,1.46]                   | 0.74      | [0.53,1.03]        | 0.98      | [0.67,1.44] |
| Maternal diabetes (%)                 |                                  |           |                    |           |                               |           |                    |           |             |
|                                       | No                               | Reference |                    | Reference |                               | Reference |                    | Reference |             |
|                                       | Yes                              | 1.46      | [1.08,1.94]        | 1.69      | [1.18,2.40]                   | 1.34      | [1.03,1.75]        | 1.52      | [1.11,2.09] |
| Prepregnancy weight status (%)*       |                                  |           |                    |           |                               |           |                    |           |             |
|                                       | Underweight                      | 1.45      | [0.97,2.17]        | 1.32      | [0.79,2.20]                   | 1.56      | [1.06,2.30]        | 1.31      | [0.80,2.15] |
|                                       | Normal weight                    | Reference |                    | Reference |                               | Reference |                    | Reference |             |
|                                       | Overweight/obese                 | 0.50      | [0.40,0.63]        | 0.59      | [0.45,0.77]                   | 0.49      | [0.39,0.61]        | 0.58      | [0.44,0.75] |
| <b><u>Birth outcomes</u></b>          |                                  |           |                    |           |                               |           |                    |           |             |
| Preterm birth (%)                     |                                  |           |                    |           |                               |           |                    |           |             |
|                                       | No                               | Reference |                    | Reference |                               | Reference |                    | Reference |             |
|                                       | Yes                              | 1.50      | [1.20,1.86]        | 1.42      | [1.09,1.84]                   | 1.35      | [1.14,1.61]        | 1.30      | [1.06,1.60] |
| Fetal growth (%)¶                     |                                  |           |                    |           |                               |           |                    |           |             |
|                                       | AGA                              | Reference |                    | Reference |                               | Reference |                    | Reference |             |
|                                       | LGA                              | 0.46      | [0.27,0.78]        | 0.39      | [0.22,0.69]                   | 0.43      | [0.25,0.73]        | 0.38      | [0.21,0.66] |
|                                       | SGA                              | 1.93      | [1.49,2.51]        | 1.85      | [1.33,2.57]                   | 1.85      | [1.43,2.39]        | 1.76      | [1.27,2.42] |

\*According to the Institute of Medicine's BMI classification.

§Complete-case means only use the data without any missing.

¶ AGA: appropriate for gestational age; LGA: large for gestational age; SGA: small for gestational age

†Multiple logistic regression adjusted for: maternal age, household income, race, marital status, maternal education.

‡pooled estimates of ten imputed datasets

eTable 6. Postnatal Physical Health and Neurodevelopmental Outcomes<sup>§</sup> Associated With Maternal Opioid Exposure After Excluding Infants Born Before 2003

| Outcomes                                          | Complete-case analysis (N=5700)* |             |                    |             | Multiple imputation (N=6432)‡ |             |                    |             |
|---------------------------------------------------|----------------------------------|-------------|--------------------|-------------|-------------------------------|-------------|--------------------|-------------|
|                                                   | Crude logistic                   |             | Adjusted logistic† |             | Crude logistic                |             | Adjusted logistic† |             |
|                                                   | OR                               | 95% CI      | OR                 | 95% CI      | OR                            | 95% CI      | OR                 | 95% CI      |
| <b>All age groups</b>                             | N=2380                           |             |                    |             | N=2613                        |             |                    |             |
| ADHD                                              |                                  |             |                    |             |                               |             |                    |             |
| No                                                | Reference                        |             | Reference          |             | Reference                     |             | Reference          |             |
| Yes                                               | 1.31                             | [0.79,2.09] | 1.33               | [0.73,2.32] | 1.27                          | [0.78,2.06] | 1.27               | [0.72,2.24] |
| Conduct disorder or Emotional disturbance         |                                  |             |                    |             |                               |             |                    |             |
| No                                                | Reference                        |             | Reference          |             | Reference                     |             | Reference          |             |
| Yes                                               | 1.32                             | [0.82,2.04] | 1.37               | [0.79,2.32] | 1.26                          | [0.80,1.98] | 1.26               | [0.74,2.13] |
| Lack of expected normal physiological development |                                  |             |                    |             |                               |             |                    |             |
| No                                                | Reference                        |             | Reference          |             | Reference                     |             | Reference          |             |
| Yes                                               | 2.08                             | [1.44,3.02] | 2.15               | [1.34,3.45] | 2.02                          | [1.40,2.90] | 1.97               | [1.24,3.13] |
| <b>Medical record within first 5 years</b>        | N=2378                           |             |                    |             | N=2610                        |             |                    |             |
| ADHD                                              |                                  |             |                    |             |                               |             |                    |             |
| No                                                | Reference                        |             | Reference          |             | Reference                     |             | Reference          |             |
| Yes                                               | 1.19                             | [0.49,2.43] | 0.80               | [0.29,1.94] | 1.14                          | [0.52,2.49] | 0.76               | [0.30,1.91] |
| Conduct disorder or Emotional disturbance         |                                  |             |                    |             |                               |             |                    |             |
| No                                                | Reference                        |             | Reference          |             | Reference                     |             | Reference          |             |
| Yes                                               | 1.79                             | [1.04,2.91] | 1.75               | [0.92,3.21] | 1.75                          | [1.05,2.90] | 1.67               | [0.90,3.07] |
| Lack of expected normal physiological development |                                  |             |                    |             |                               |             |                    |             |
| No                                                | Reference                        |             | Reference          |             | Reference                     |             | Reference          |             |
| Yes                                               | 1.81                             | [1.26,2.61] | 1.81               | [1.13,2.91] | 1.76                          | [1.23,2.53] | 1.70               | [1.07,2.70] |
| <b>Medical record at 6 and older</b>              | N=1703                           |             |                    |             | N=1866                        |             |                    |             |
| ADHD                                              |                                  |             |                    |             |                               |             |                    |             |
| No                                                | Reference                        |             | Reference          |             | Reference                     |             | Reference          |             |
| Yes                                               | 3.19                             | [1.75,5.67] | 2.77               | [1.44,5.21] | 3.15                          | [1.76,5.63] | 2.66               | [1.41,5.02] |
| Conduct disorder or Emotional disturbance         |                                  |             |                    |             |                               |             |                    |             |
| No                                                | Reference                        |             | Reference          |             | Reference                     |             | Reference          |             |
| Yes                                               | 2.15                             | [1.09,3.99] | 1.81               | [0.86,3.59] | 2.07                          | [1.09,3.95] | 1.71               | [0.85,3.44] |
| Lack of expected normal physiological development |                                  |             |                    |             |                               |             |                    |             |
| No                                                | Reference                        |             | Reference          |             | Reference                     |             | Reference          |             |
| Yes                                               | 0.72                             | [0.25,1.67] | 0.52               | [0.17,1.29] | 0.71                          | [0.28,1.81] | 0.49               | [0.18,1.32] |

§Based on ICD-9 and ICD-10 diagnosis codes: ADHD (ICD-9: 314.0-314.9; ICD-10: F90.0-F90.9), conduct disorder or emotional disturbance (ICD-9: 312.0-312.9, 313.0-313.9; ICD-10: F91.0-F91.9, F93.0, F93.8, F93.9), and lack of expected normal physiological development (ICD-9: 783.40-783.43; ICD-10: R62.0, R62.50-R62.59).

\*Complete-case means only use the data without any missing.

†Multiple logistic regression adjusted for: maternal age, household income, race, marital status, maternal education, preterm birth, low birthweight.

‡pooled estimates of ten imputed datasets

eTable 7. Pregnancy Complications and Birth Outcomes Associated With Maternal Opioid Exposure, Further Adjusting Birth Year Period (1998-2007 Vs 2008-2014+)

| Outcomes                              | Complete-case analysis (N=7281)§ |           |                    |           | Multiple imputation (N=8509)‡ |           |                    |           |             |
|---------------------------------------|----------------------------------|-----------|--------------------|-----------|-------------------------------|-----------|--------------------|-----------|-------------|
|                                       | Crude logistic                   |           | Adjusted logistic† |           | Crude logistic                |           | Adjusted logistic† |           |             |
|                                       | OR                               | 95% CI    | OR                 | 95% CI    | OR                            | 95% CI    | OR                 | 95% CI    |             |
| N                                     |                                  |           |                    |           |                               |           |                    |           |             |
| <b><u>Pregnancy complications</u></b> |                                  |           |                    |           |                               |           |                    |           |             |
| Hypertensive disorder (%)             |                                  |           |                    |           |                               |           |                    |           |             |
|                                       | No                               | Reference |                    | Reference |                               | Reference |                    | Reference |             |
|                                       | Yes                              | 0.7<br>1  | [0.51,0.98]        | 0.9<br>3  | [0.64,1.33]                   | 0.7<br>2  | [0.52,0.99]        | 0.9<br>1  | [0.64,1.30] |
| Maternal diabetes (%)                 |                                  |           |                    |           |                               |           |                    |           |             |
|                                       | No                               | Reference |                    | Reference |                               | Reference |                    | Reference |             |
|                                       | Yes                              | 1.4<br>2  | [1.06,1.87]        | 1.5<br>8  | [1.12,2.19]                   | 1.4<br>2  | [1.08,1.87]        | 1.5<br>7  | [1.14,2.17] |
| Prepregnancy weight status (%)*       |                                  |           |                    |           |                               |           |                    |           |             |
|                                       | Underweight                      | 1.2<br>5  | [0.84,1.84]        | 1.1<br>6  | [0.72,1.85]                   | 1.3<br>6  | [0.94,1.97]        | 1.1<br>8  | [0.76,1.85] |
|                                       | Normal weight                    | Reference |                    | Reference |                               | Reference |                    | Reference |             |
|                                       | Overweight/obese                 | 0.5<br>1  | [0.42,0.64]        | 0.5<br>7  | [0.45,0.73]                   | 0.5<br>2  | [0.42,0.64]        | 0.5<br>8  | [0.46,0.73] |
| <b><u>Birth outcomes</u></b>          |                                  |           |                    |           |                               |           |                    |           |             |
| Preterm birth (%)                     |                                  |           |                    |           |                               |           |                    |           |             |
|                                       | No                               | Reference |                    | Reference |                               | Reference |                    | Reference |             |
|                                       | Yes                              | 1.5<br>0  | [1.22,1.84]        | 1.4<br>5  | [1.14,1.84]                   | 1.6<br>0  | [1.31,1.95]        | 1.5<br>1  | [1.21,1.90] |
| Fetal growth (%)¶                     |                                  |           |                    |           |                               |           |                    |           |             |
|                                       | AGA                              | Reference |                    | Reference |                               | Reference |                    | Reference |             |
|                                       | LGA                              | 0.4<br>8  | [0.29,0.77]        | 0.4<br>3  | [0.25,0.71]                   | 0.4<br>7  | [0.29,0.75]        | 0.4<br>2  | [0.25,0.68] |
|                                       | SGA                              | 1.9<br>4  | [1.53,2.47]        | 1.9<br>7  | [1.47,2.64]                   | 1.8<br>4  | [1.46,2.33]        | 1.8<br>8  | [1.42,2.50] |

\*According to the Institute of Medicine's BMI classification.

§Complete-case means only use the data without any missing.

¶ AGA: appropriate for gestational age; LGA: large for gestational age; SGA: small for gestational age

†Multiple logistic regression adjusted for: maternal age, household income, race, marital status, maternal education, birth year period (1998-2007 vs 2008-2014+).

‡pooled estimates of ten imputed datasets
